# Supplementary material for: Evaluation of CMORPH, PERSIANN-CDR, CHIRPS V2.0, TMPA 3B42 V7, and GPM IMERG V6 Satellite Precipitation Datasets in Arabian Arid Regions
Source: MDPI journal article supplement (doi:10.3390/w15010092), 2022-12-27
Supplement: s1 [file s1]

# Supplementary Materials

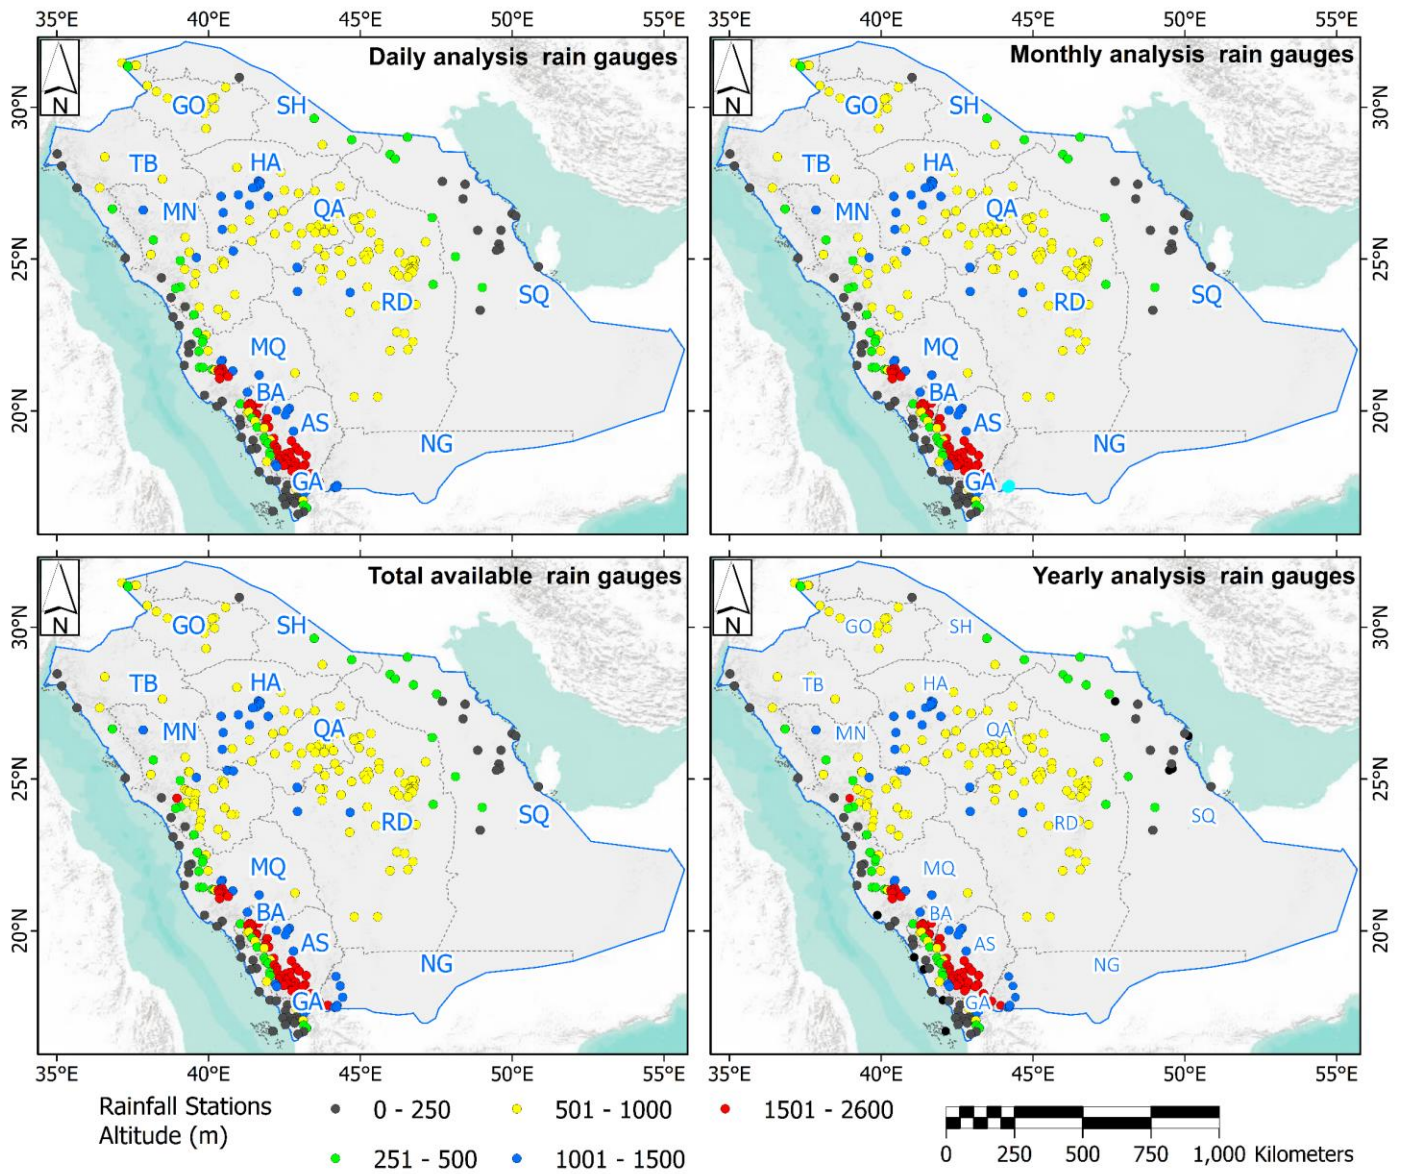

**Figure S1.** The distribution of the selected rain gauges for each analysis period

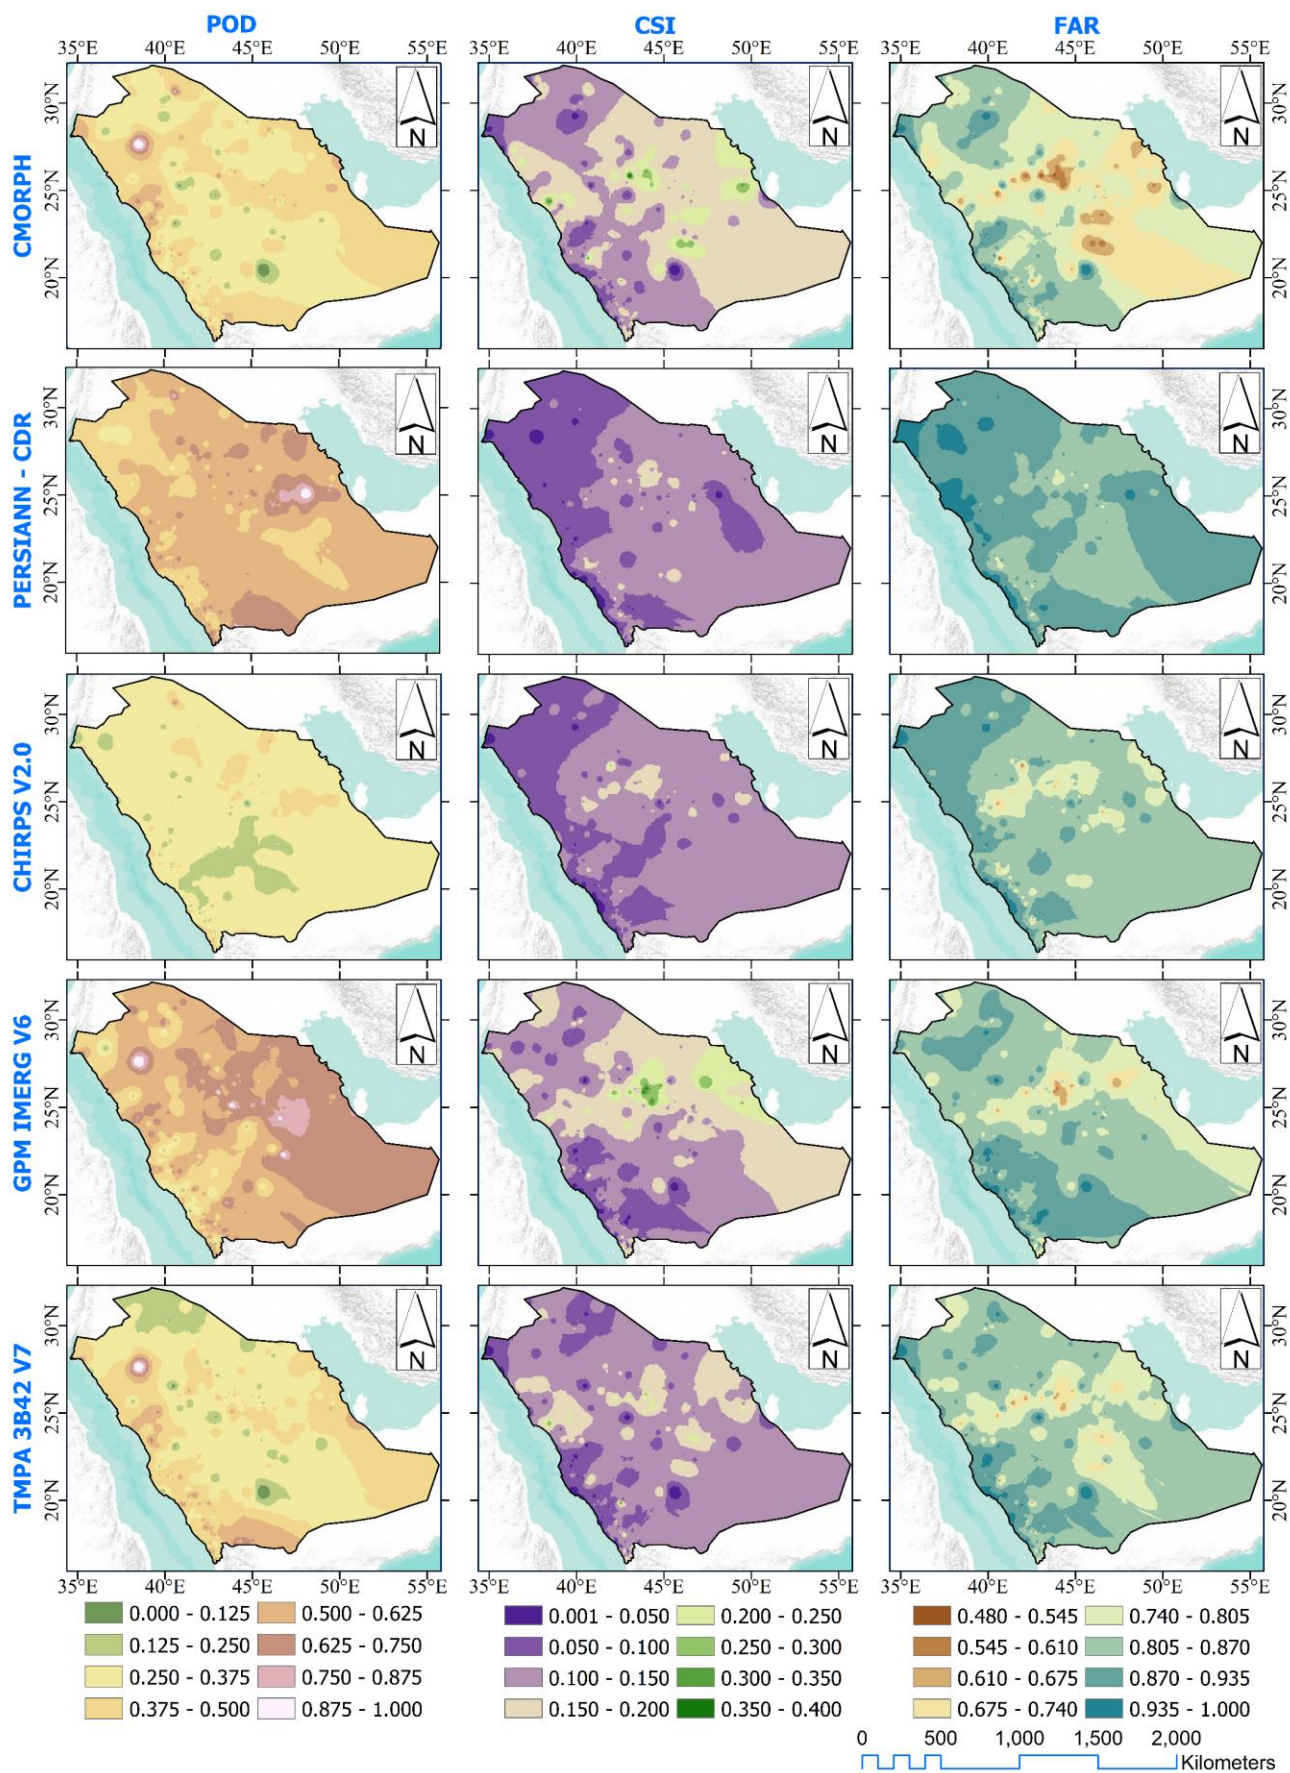

**Figure S2.** Spatial distribution of categorical metrics (POD, CSI, and FAR) over the study area.



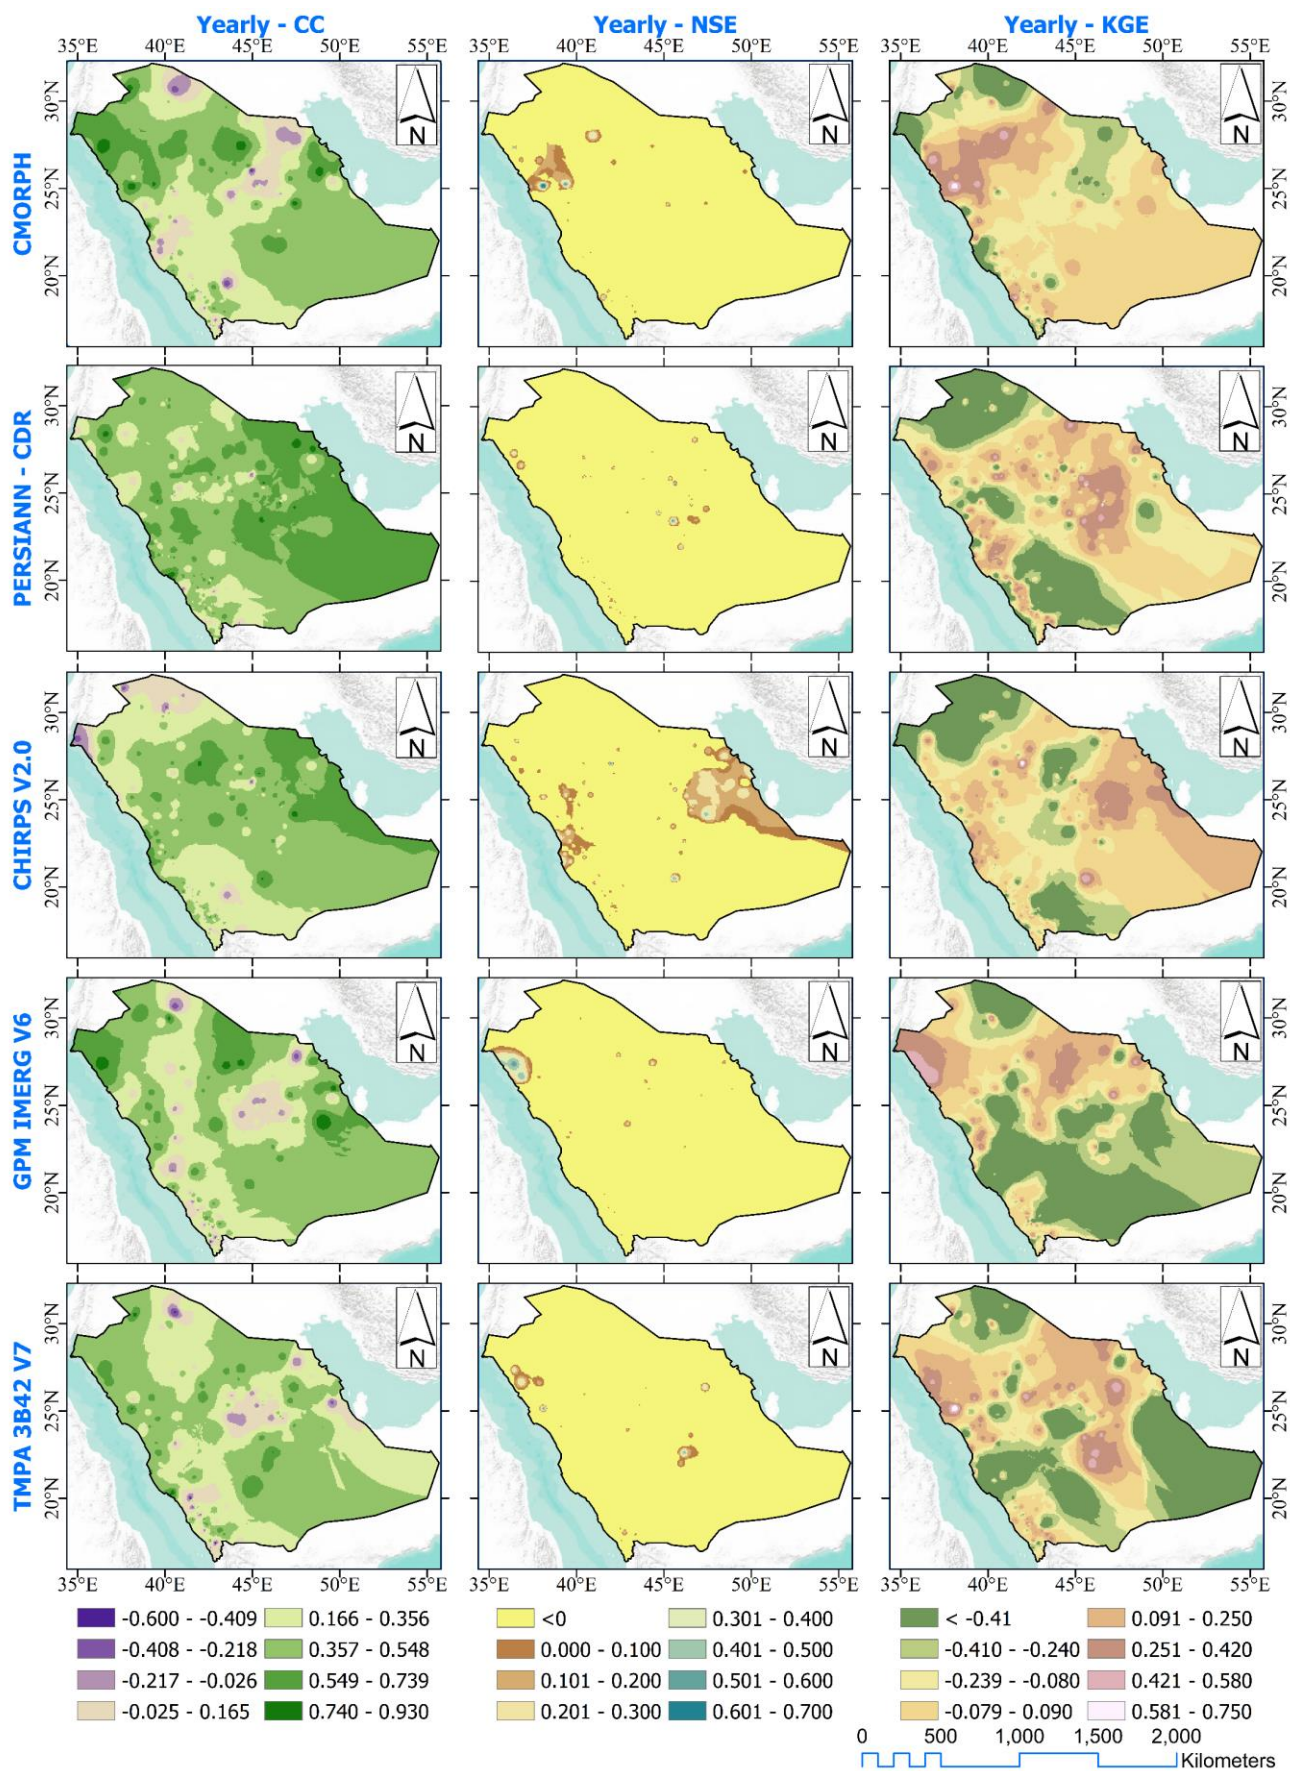

**Figure S3.** Spatial distribution of yearly statistical quantitative metrics (CC, NSE, and KGE) over the study area.



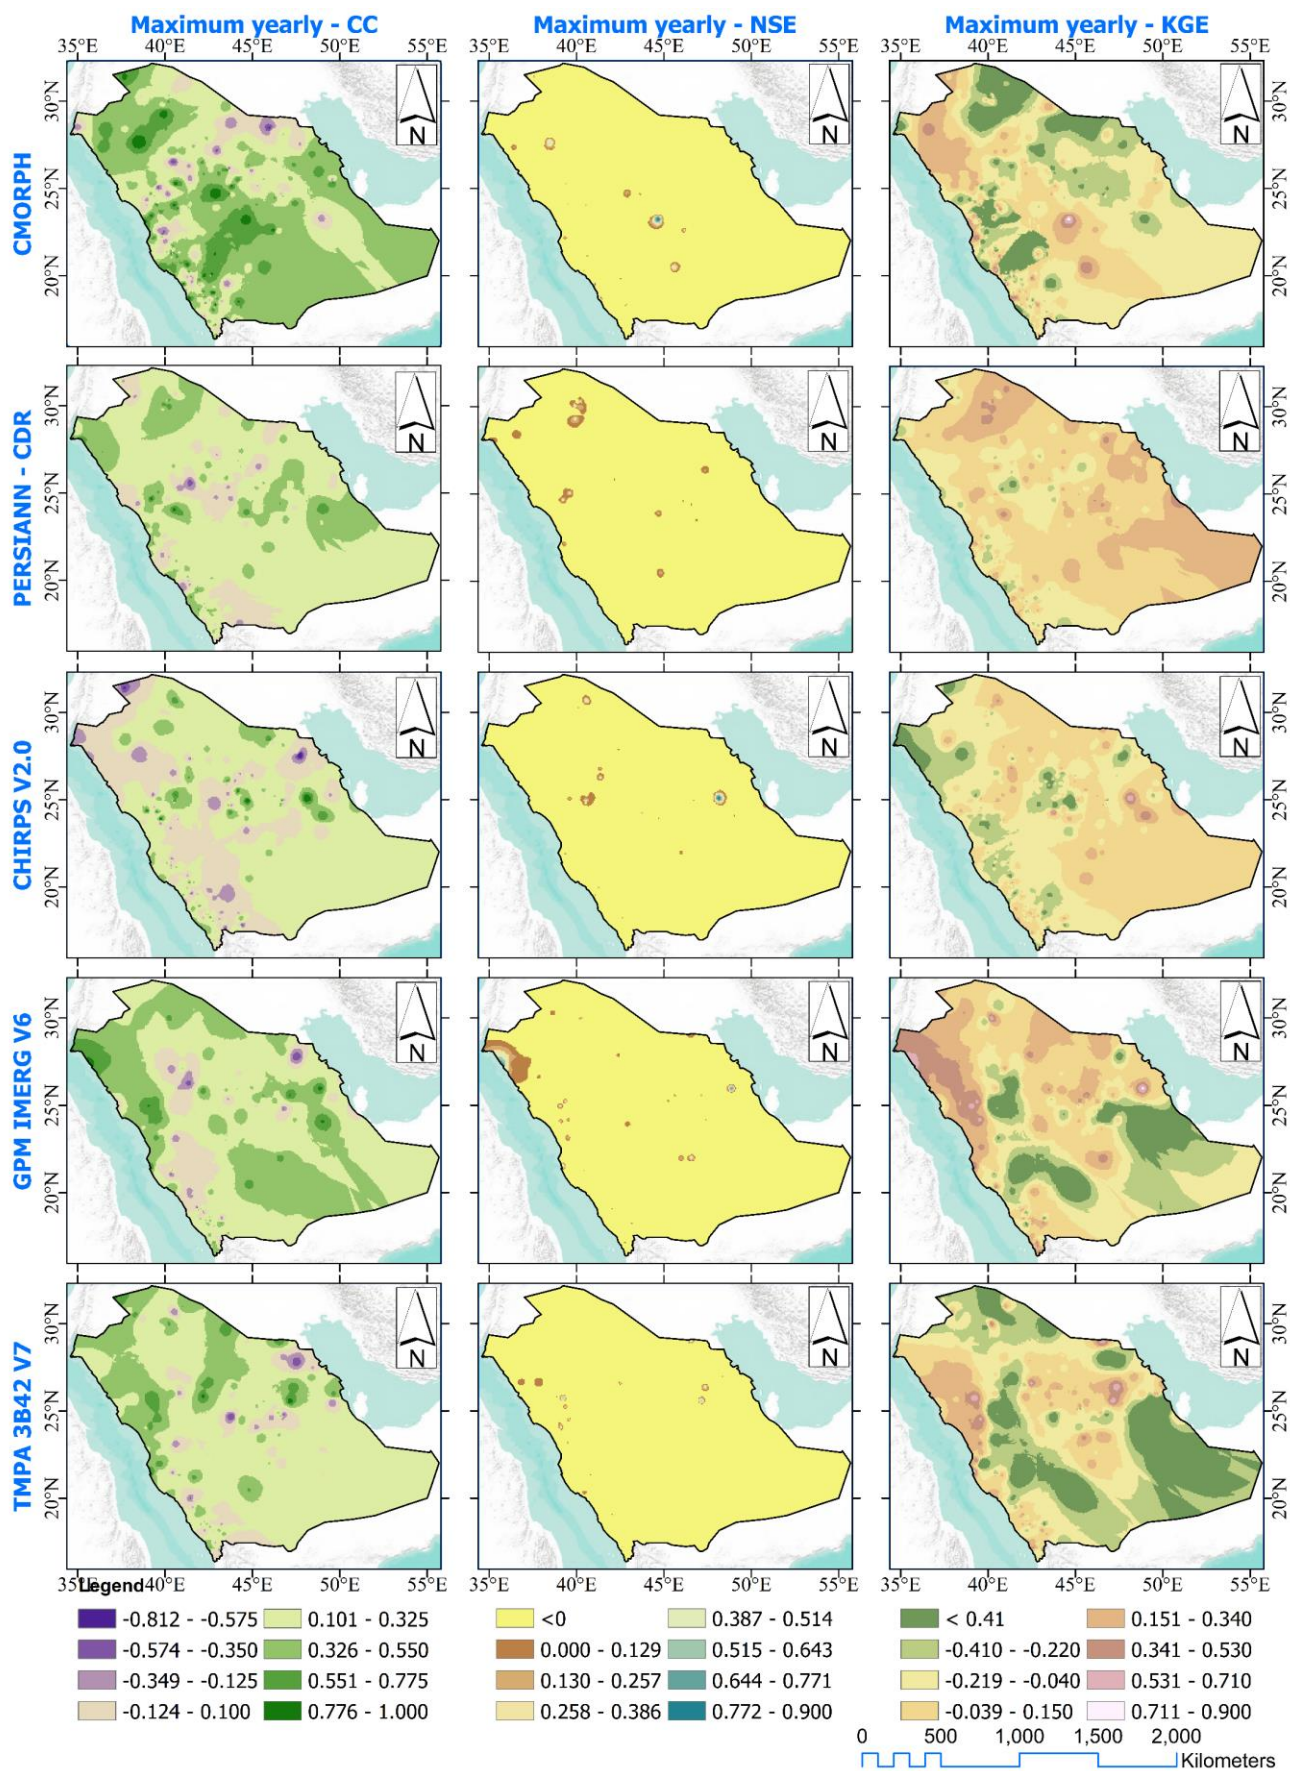

**Figure S4.** Spatial distribution of max. yearly statistical. quantitative metrics (CC, NSE, and KGE) over the study area.

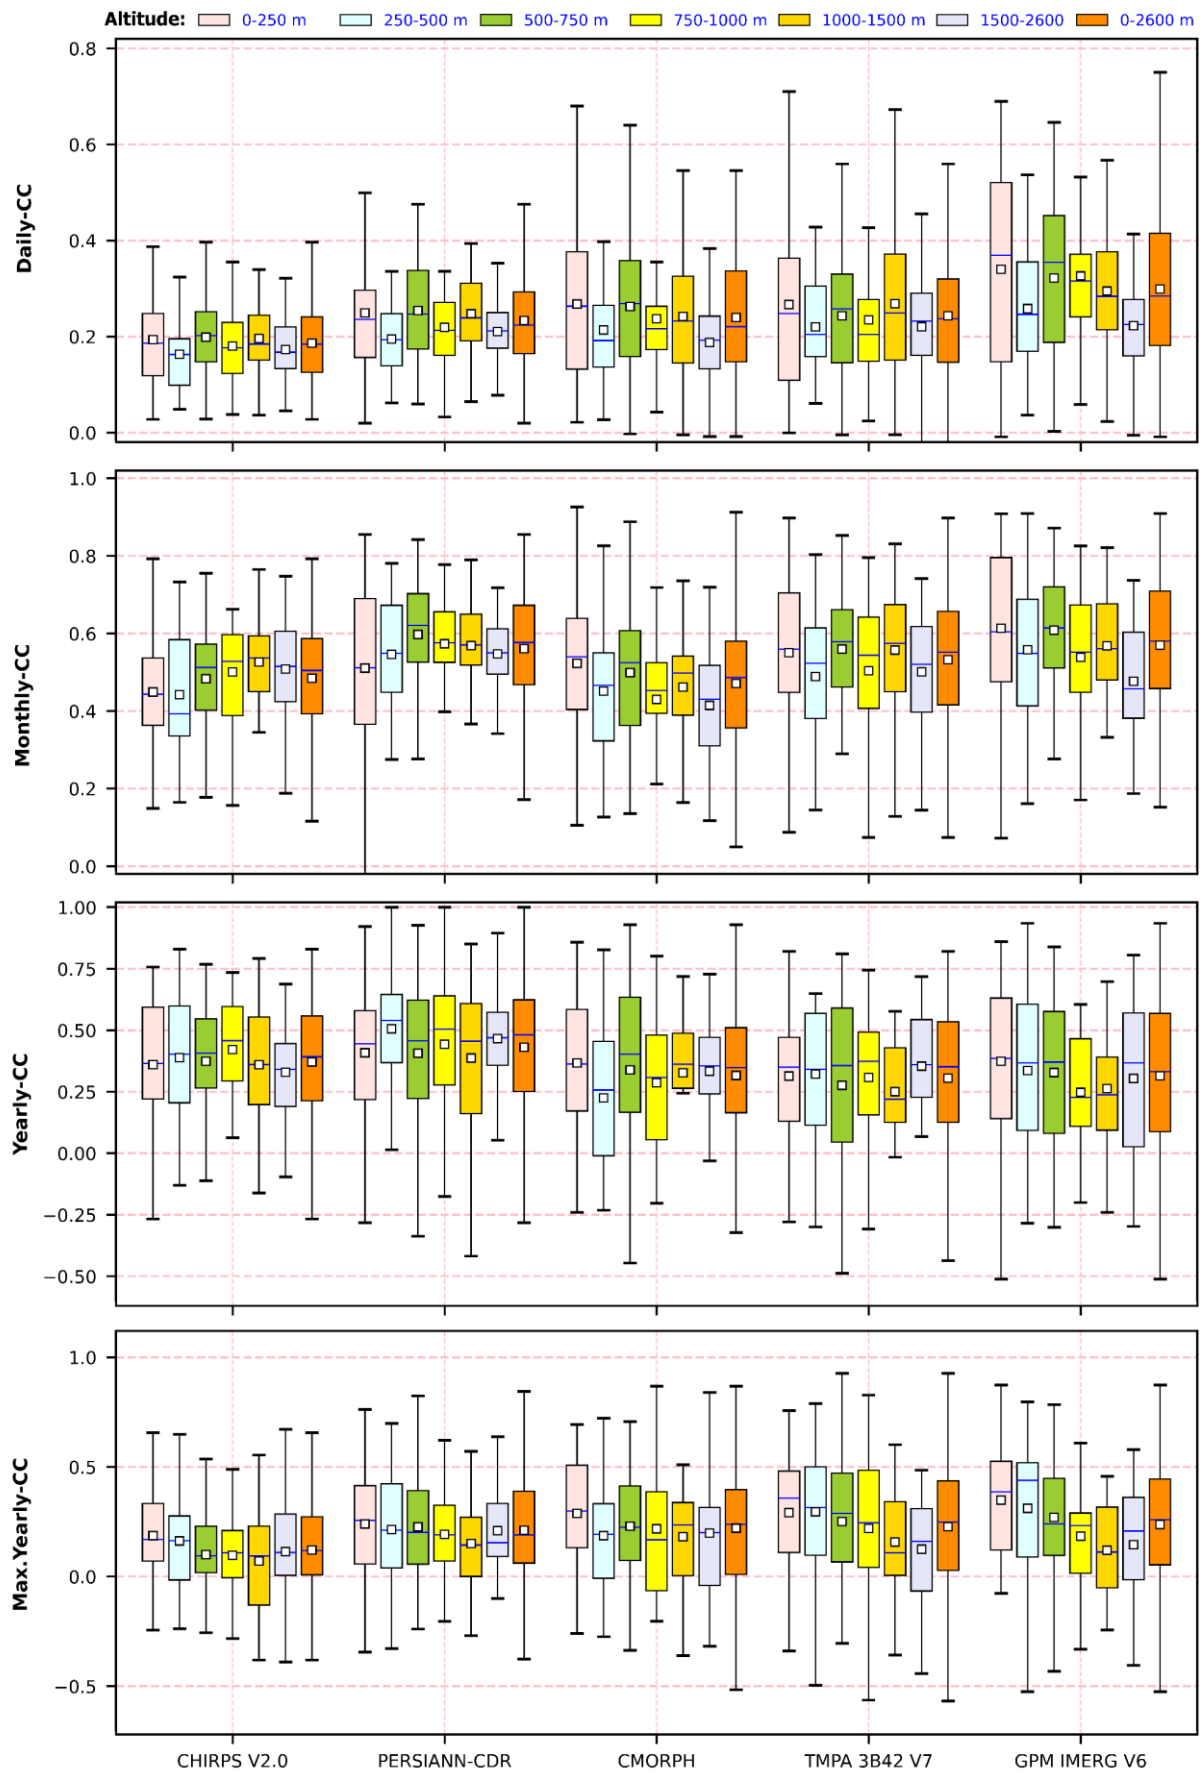

**Figure S5.** Variation of correlation coefficient with gauge altitude for each analysis duration.



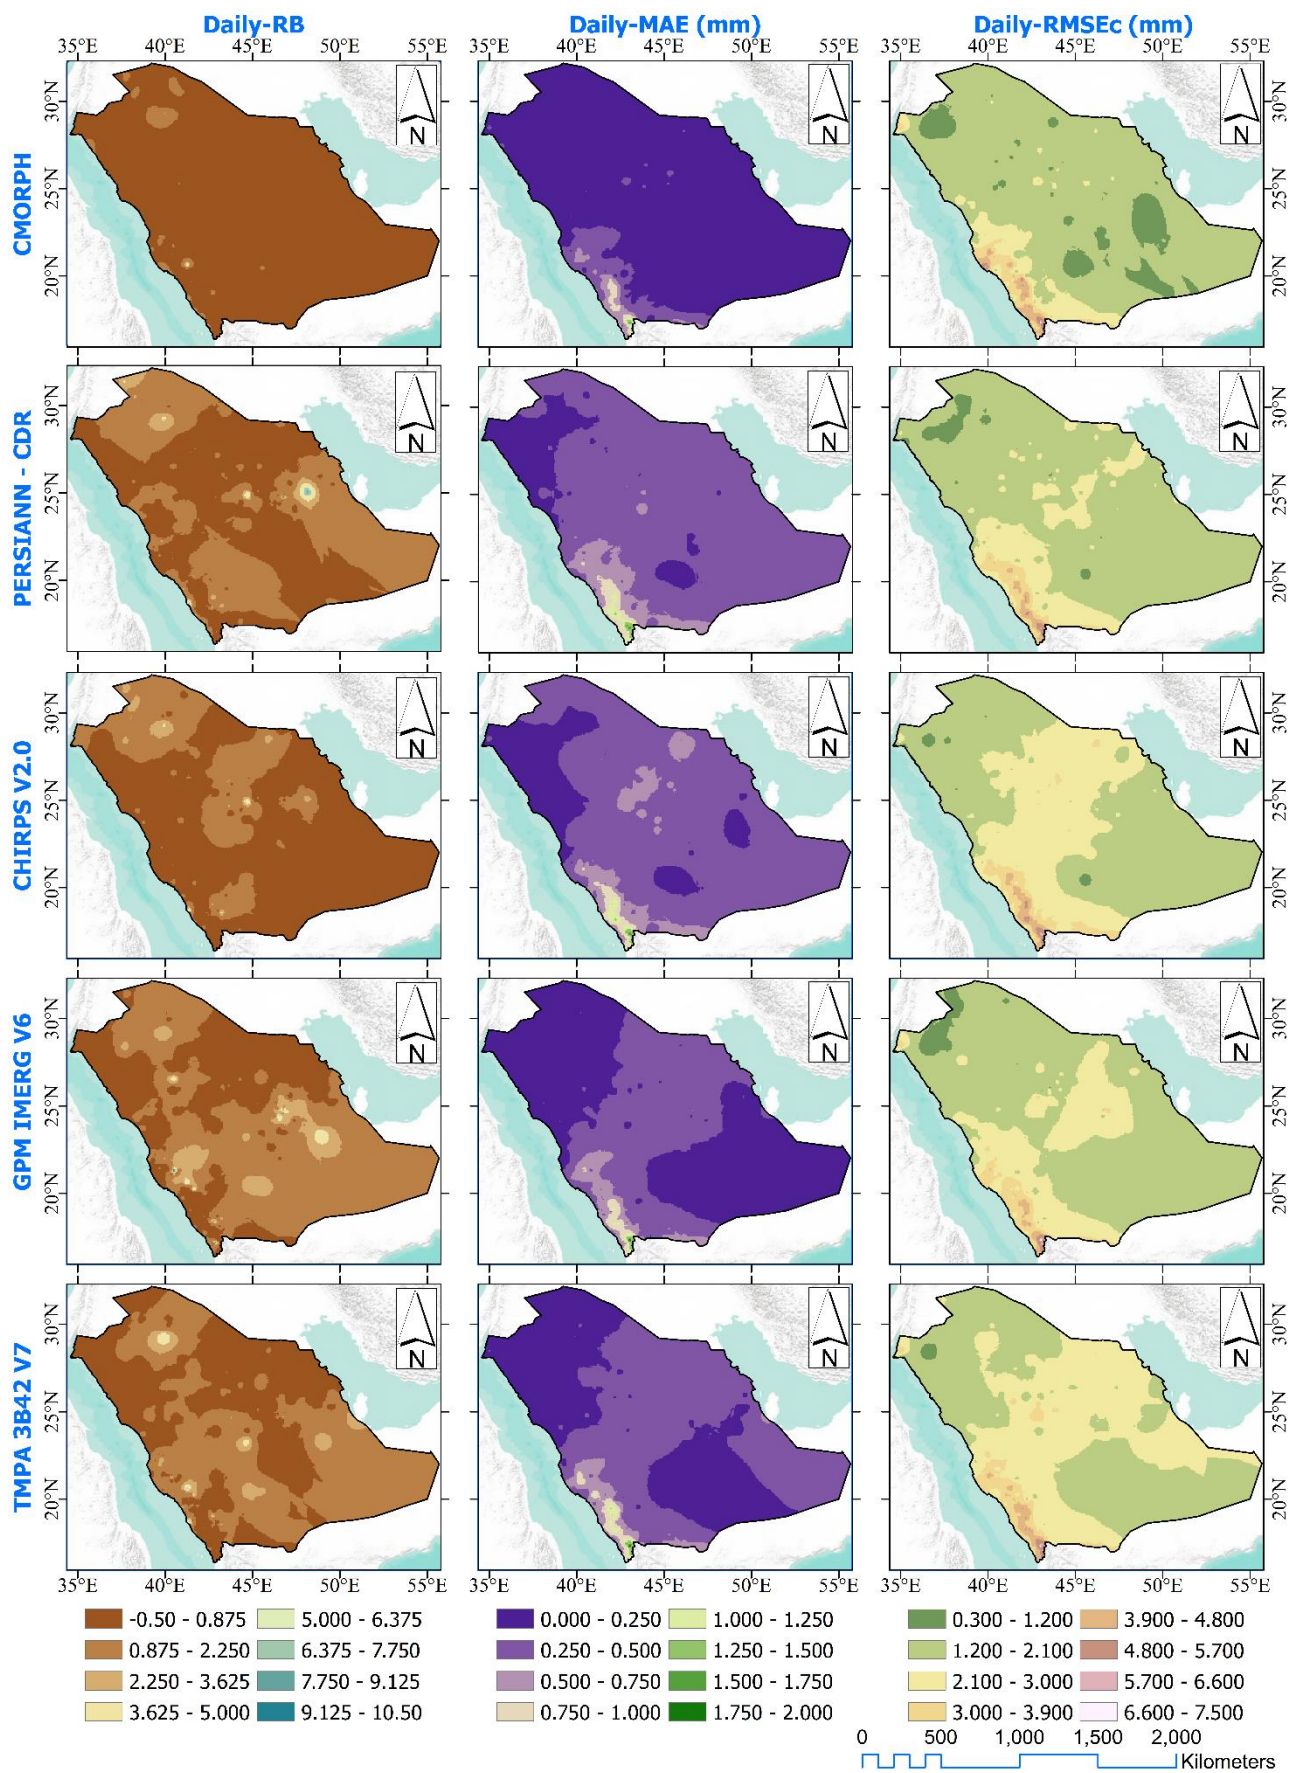

Figure S6. Spatial variation of daily RB, MAE, and **RMSEc** over the study area.

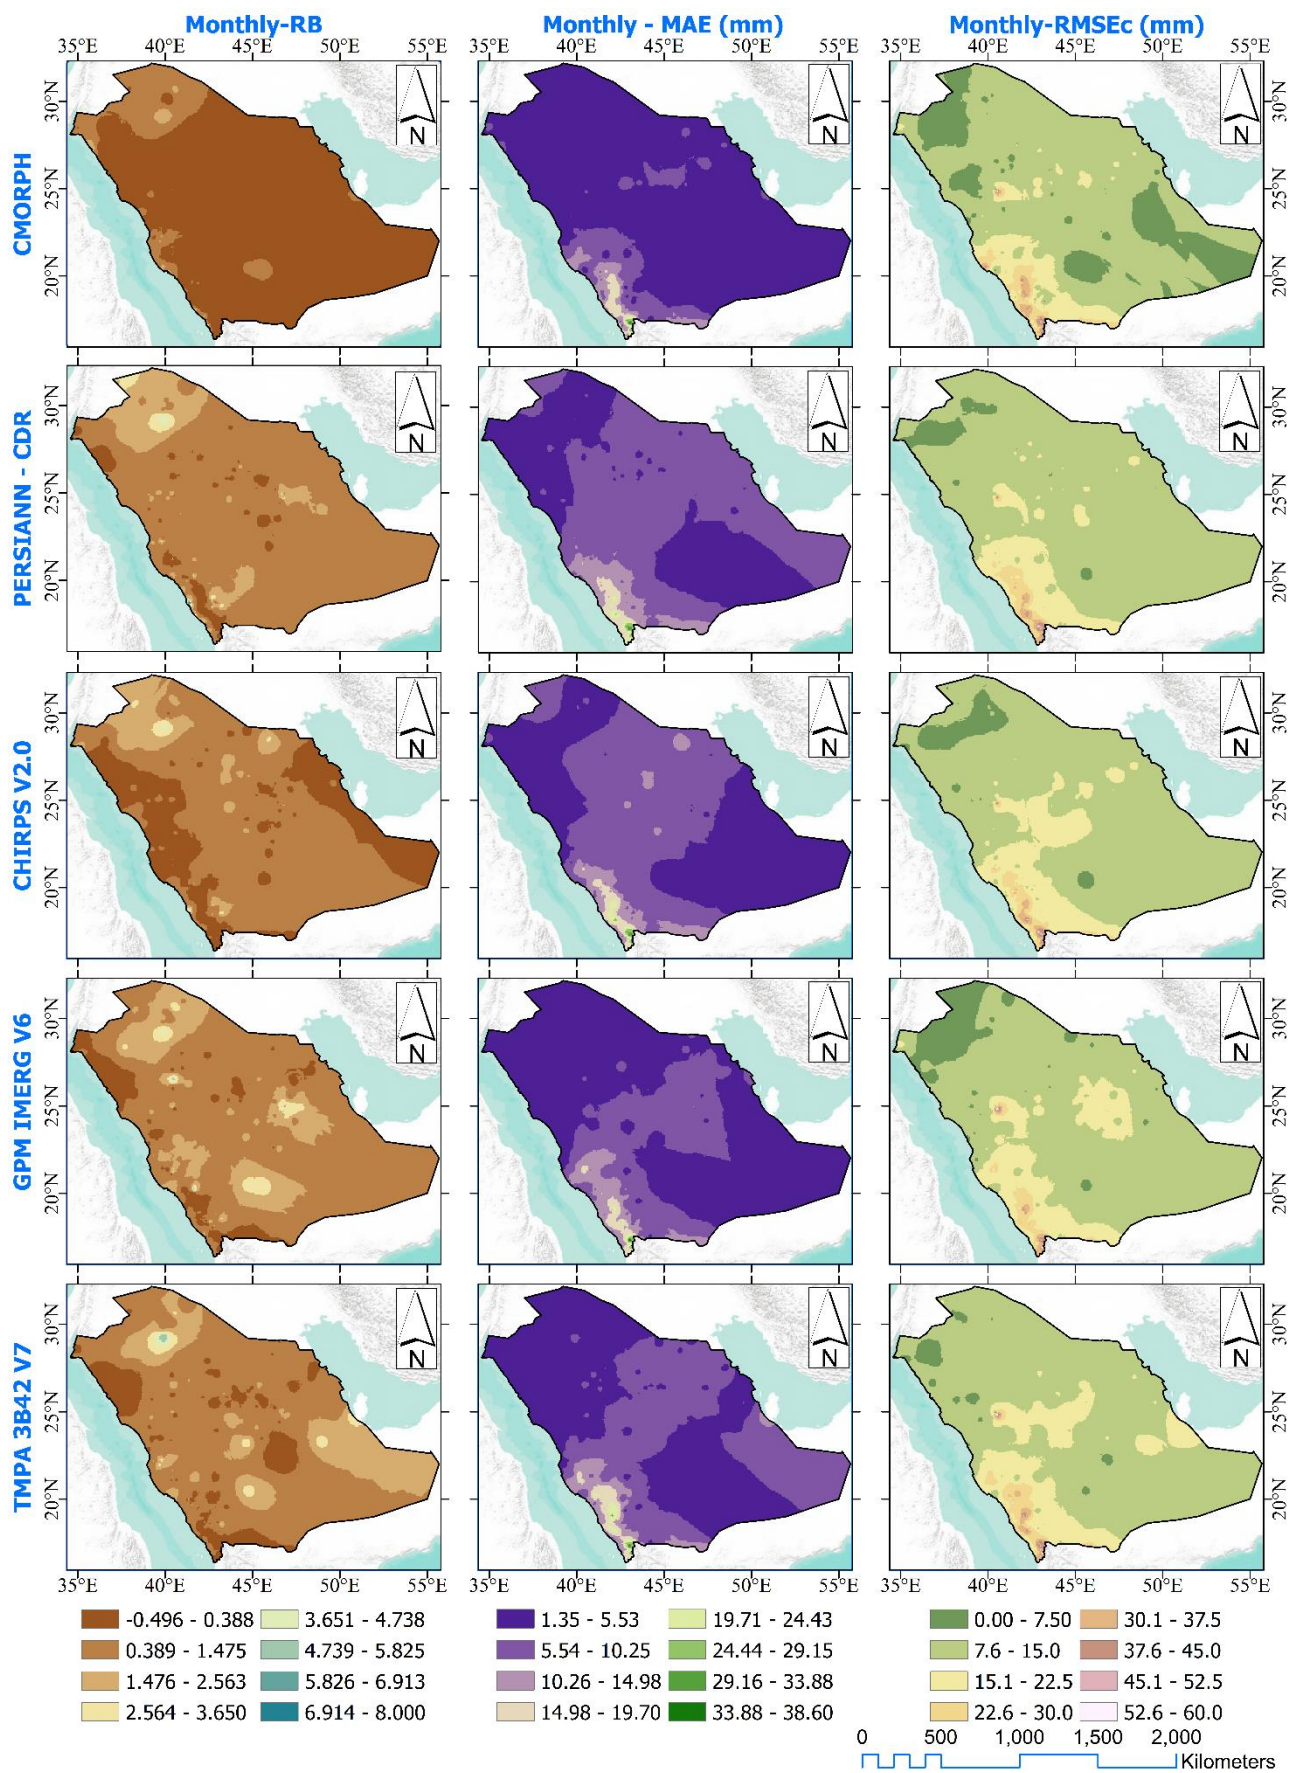

Figure S7. Spatial variation of monthly RB, MAE, and **RMSEc** over the study area.



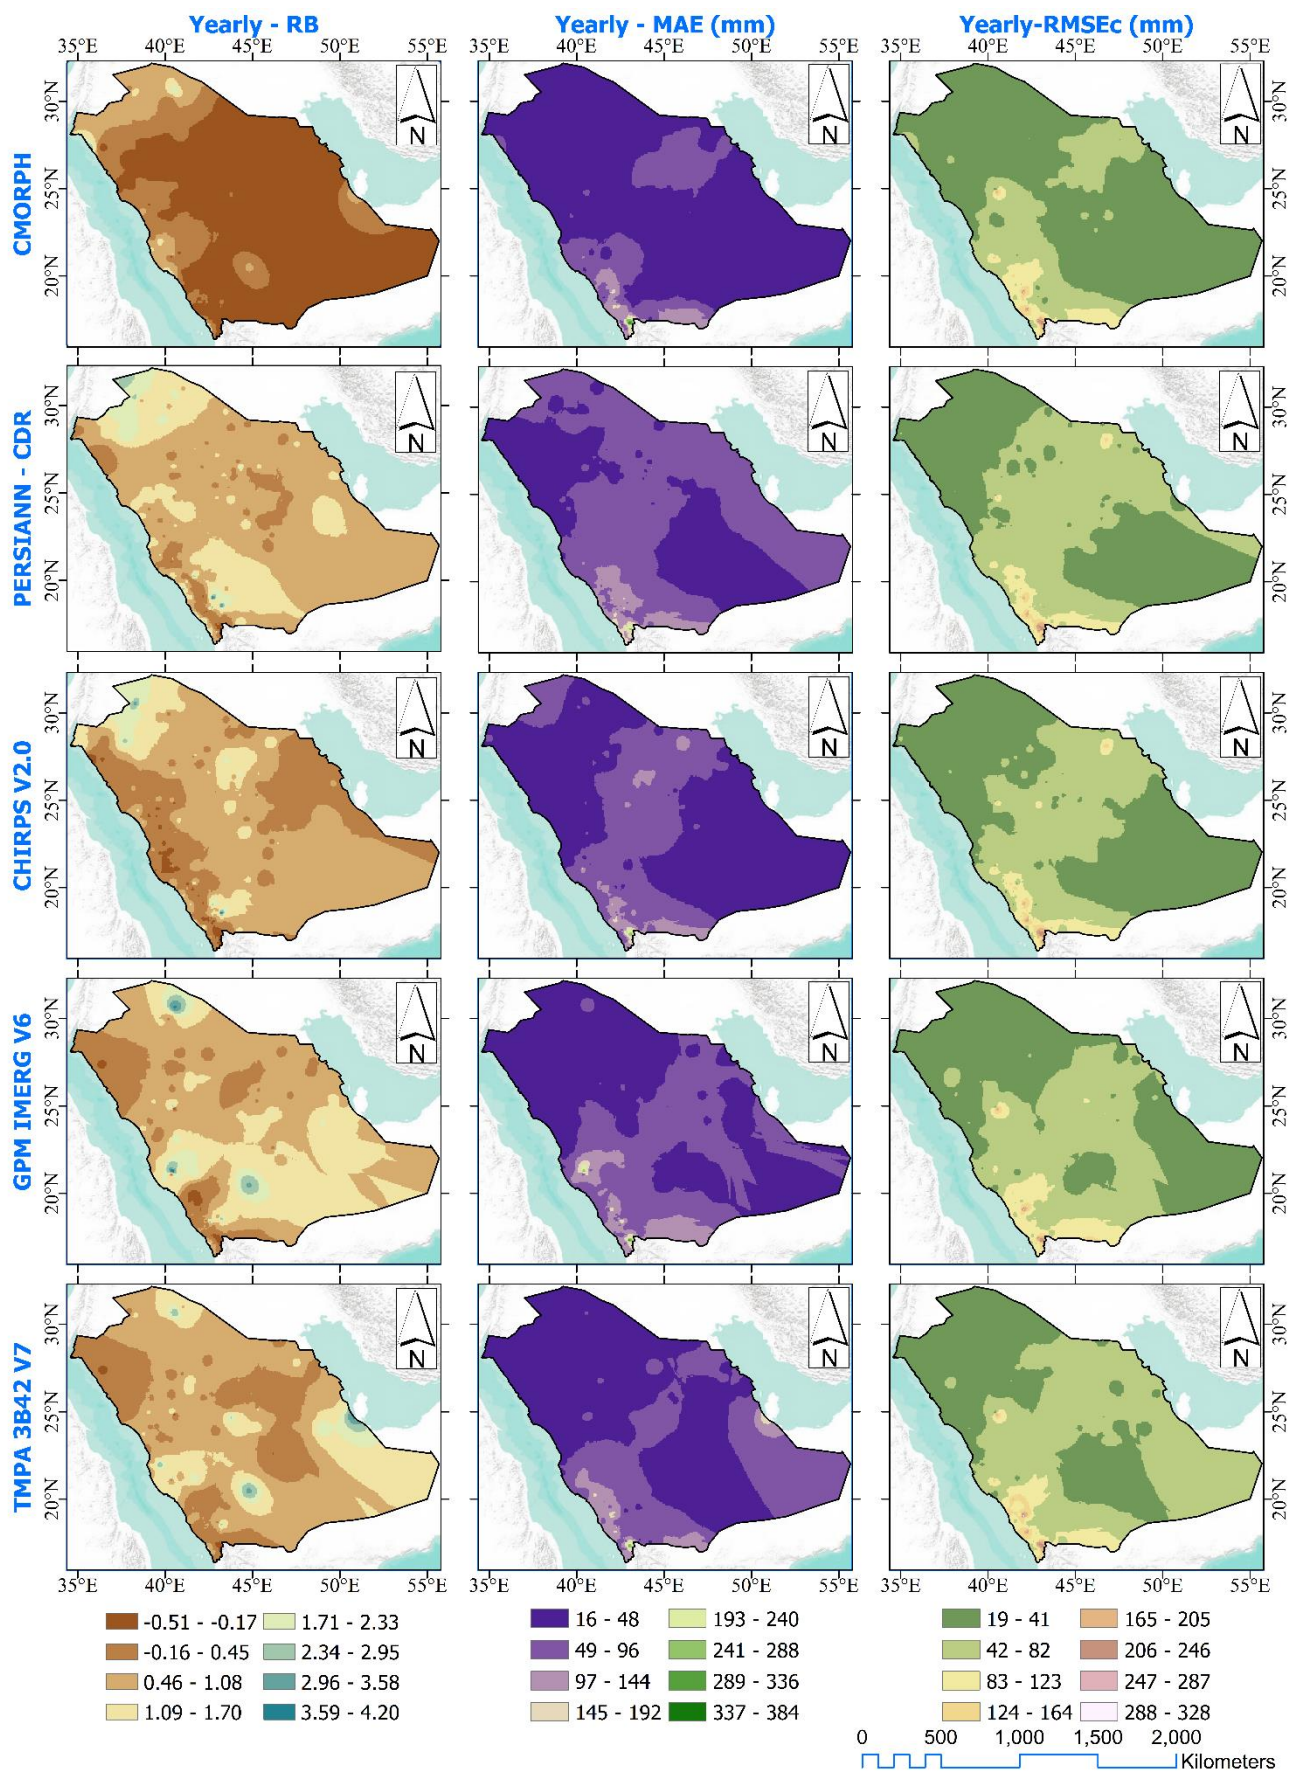

Figure S8. Spatial variation of yearly RB, MAE, and **RMSEc** over the study area.



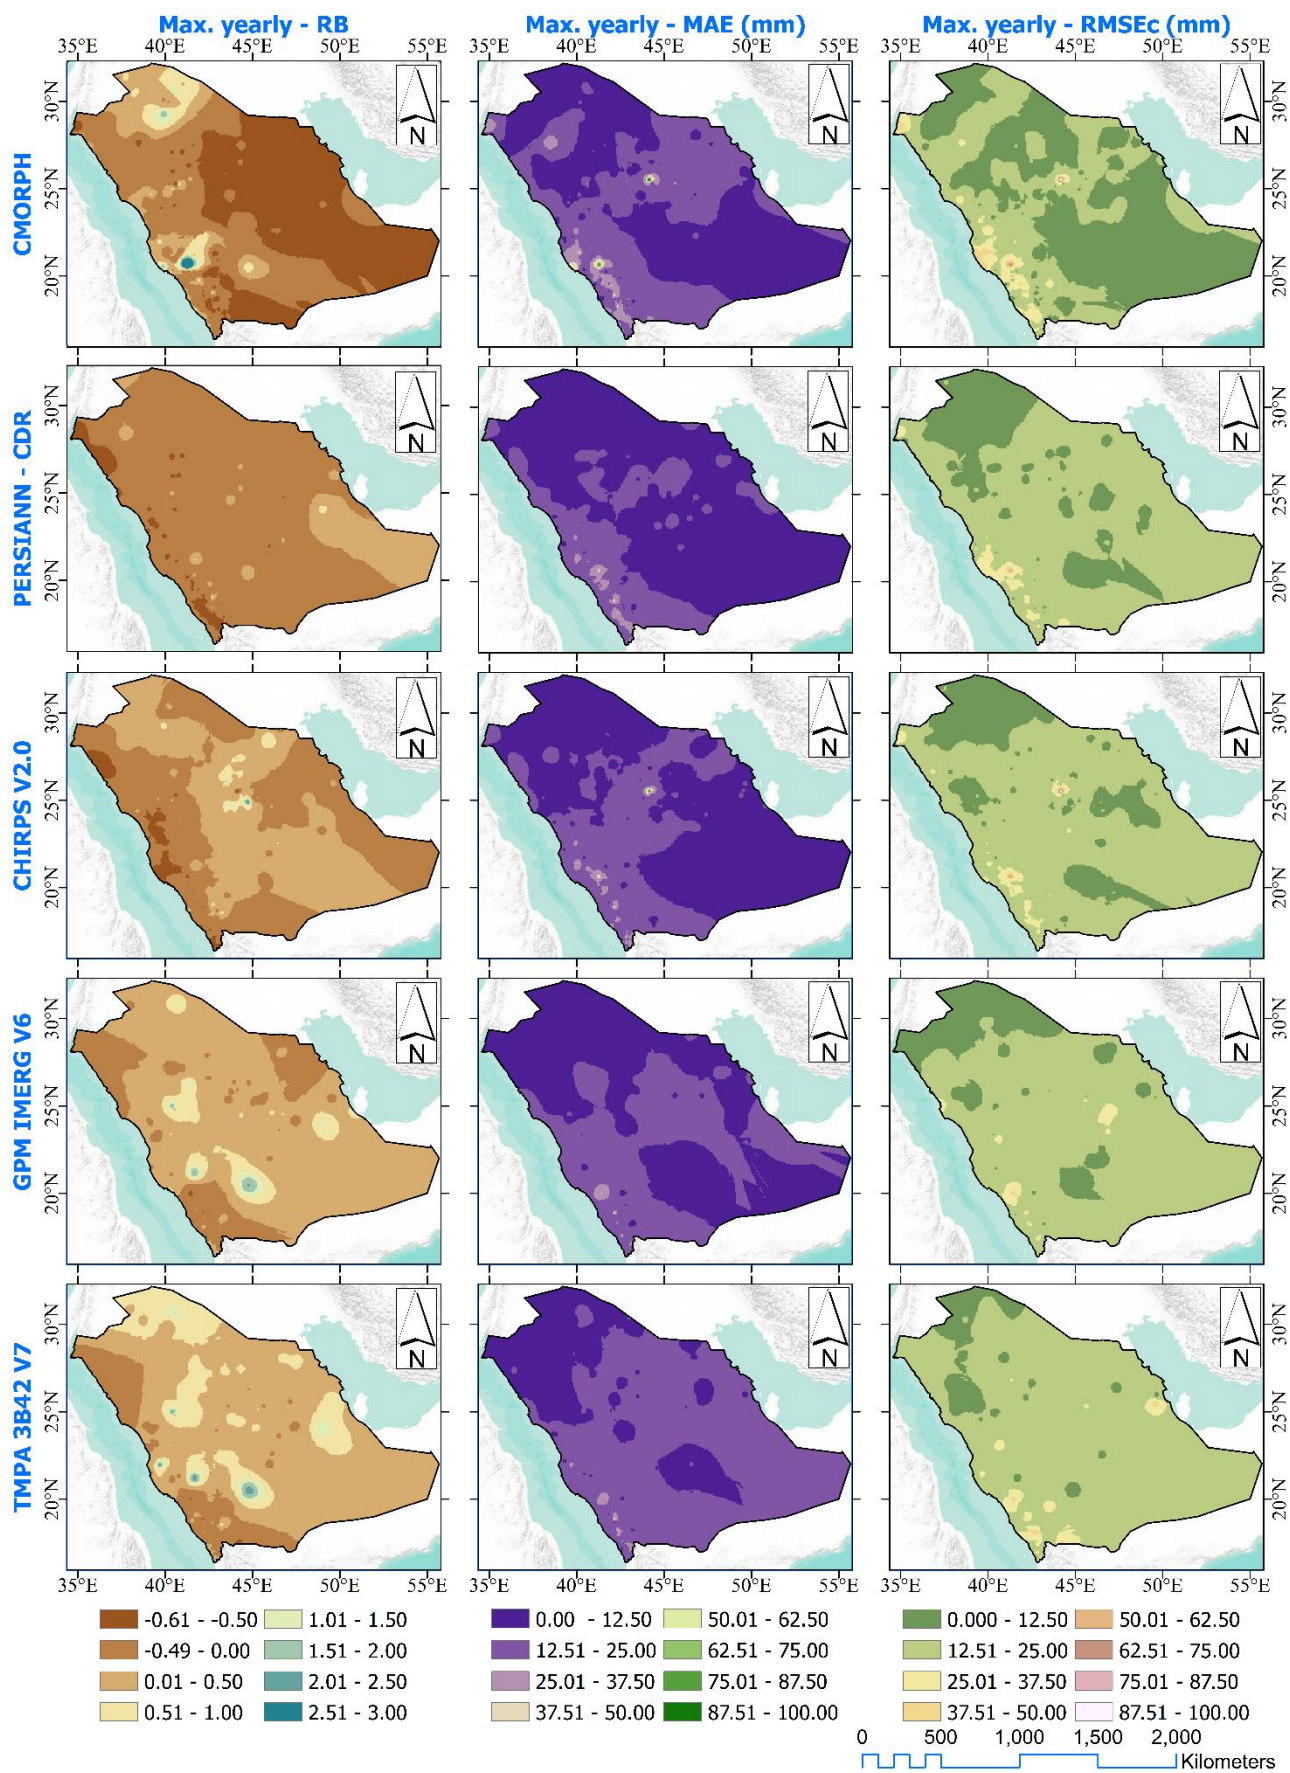

Figure S9. Spatial variation of maximum yearly RB, MAE, and **RMSEc** over the study area.

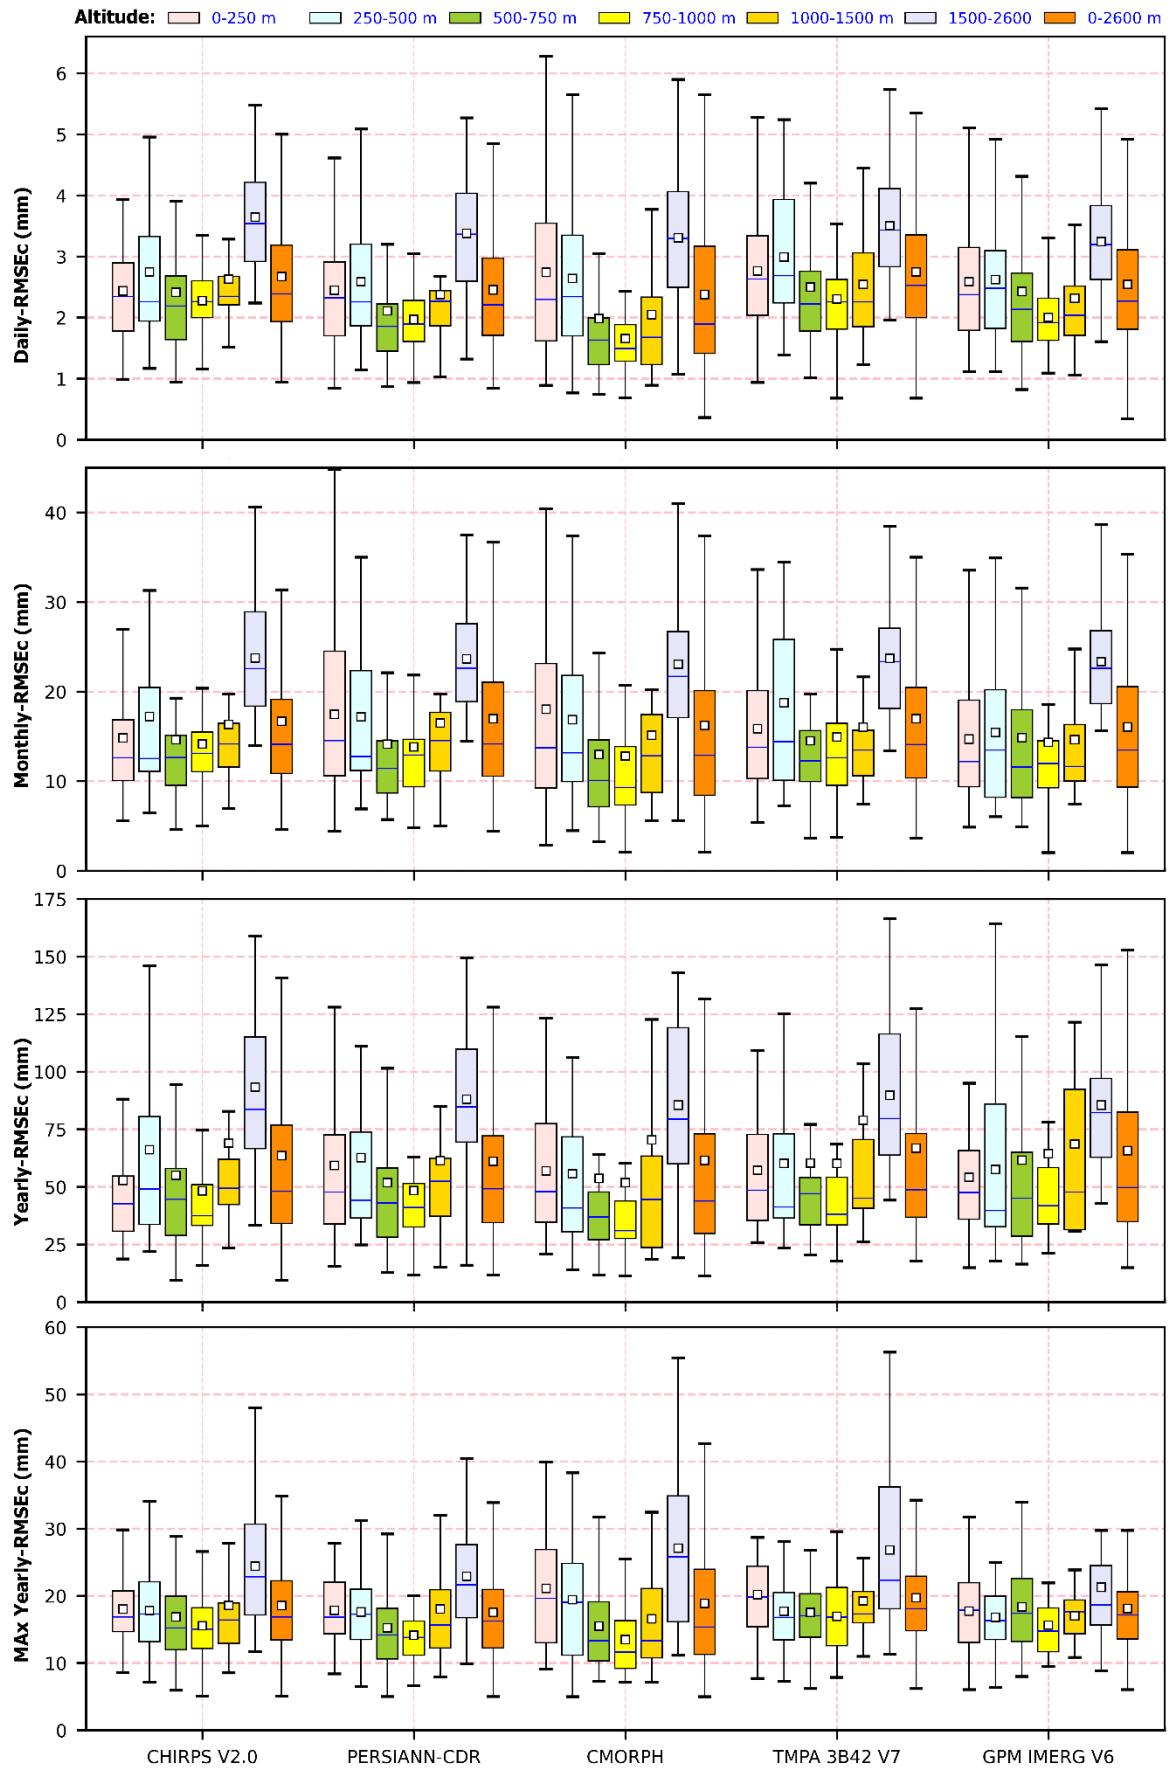

Figure S10. Variation of **RMSEc** with gauge altitude for each analysis duration.



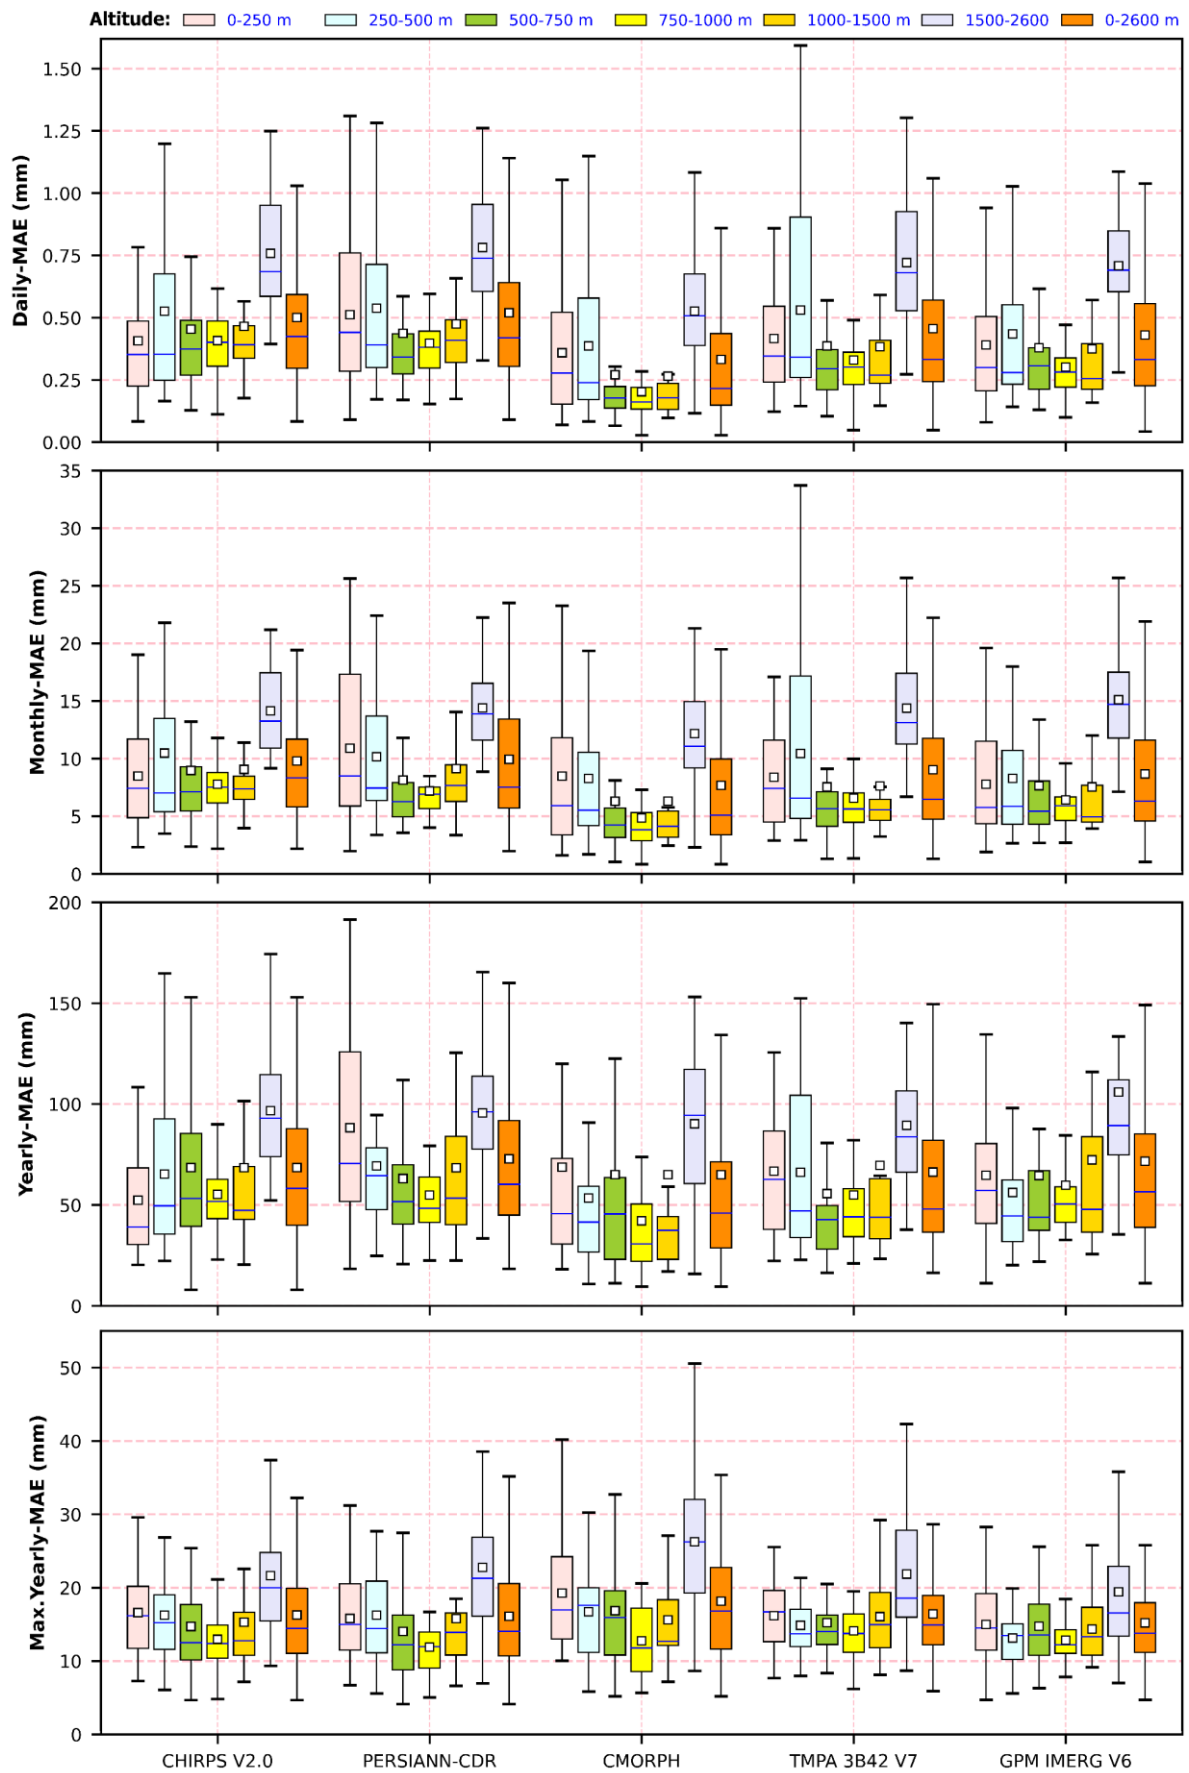

**Figure S11.** Variation of MAE with gauge altitude for each analysis duration.

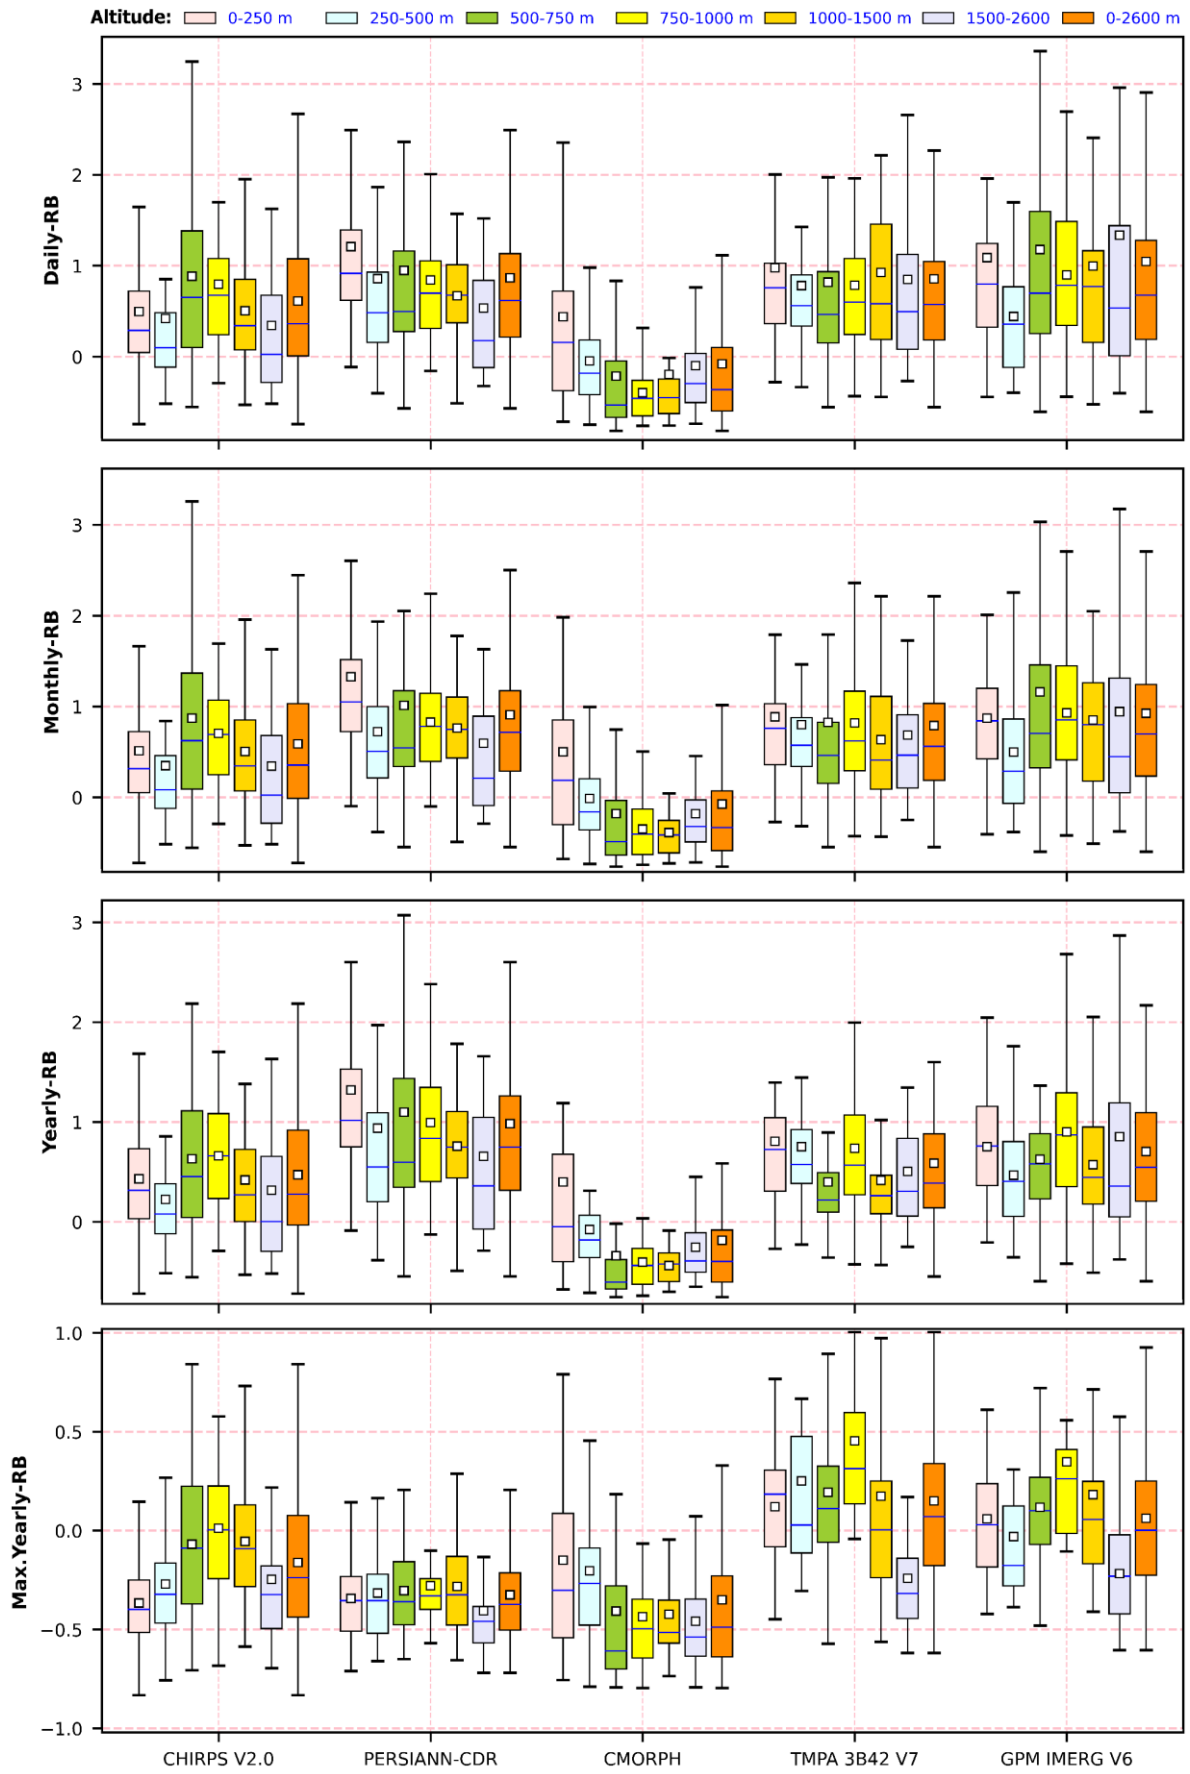

**Figure S12.** Variation of RB with gauge altitude for each analysis duration.
